# Supplementary material for: Caffeic Acid Phenethyl Ester Protects against Experimental Autoimmune Encephalomyelitis by Regulating T Cell Activities
Source: Hindawi journal article supplement (doi:10.1155/2020/7274342), 2020-10-09

1. The chemical structure of CAPE

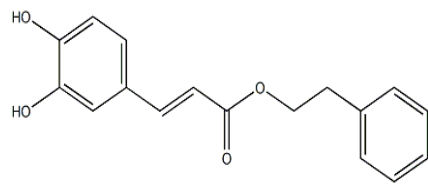

Supplement: f1 [file 7274342.f1.pdf]
